# Supplementary material
Source: HighWire-hosted journal article supplement (https://jech.bmj.com/content/73/10/971)
Supplement: inline-supplementary-material-3 [file inline-supplementary-material-3.pdf]

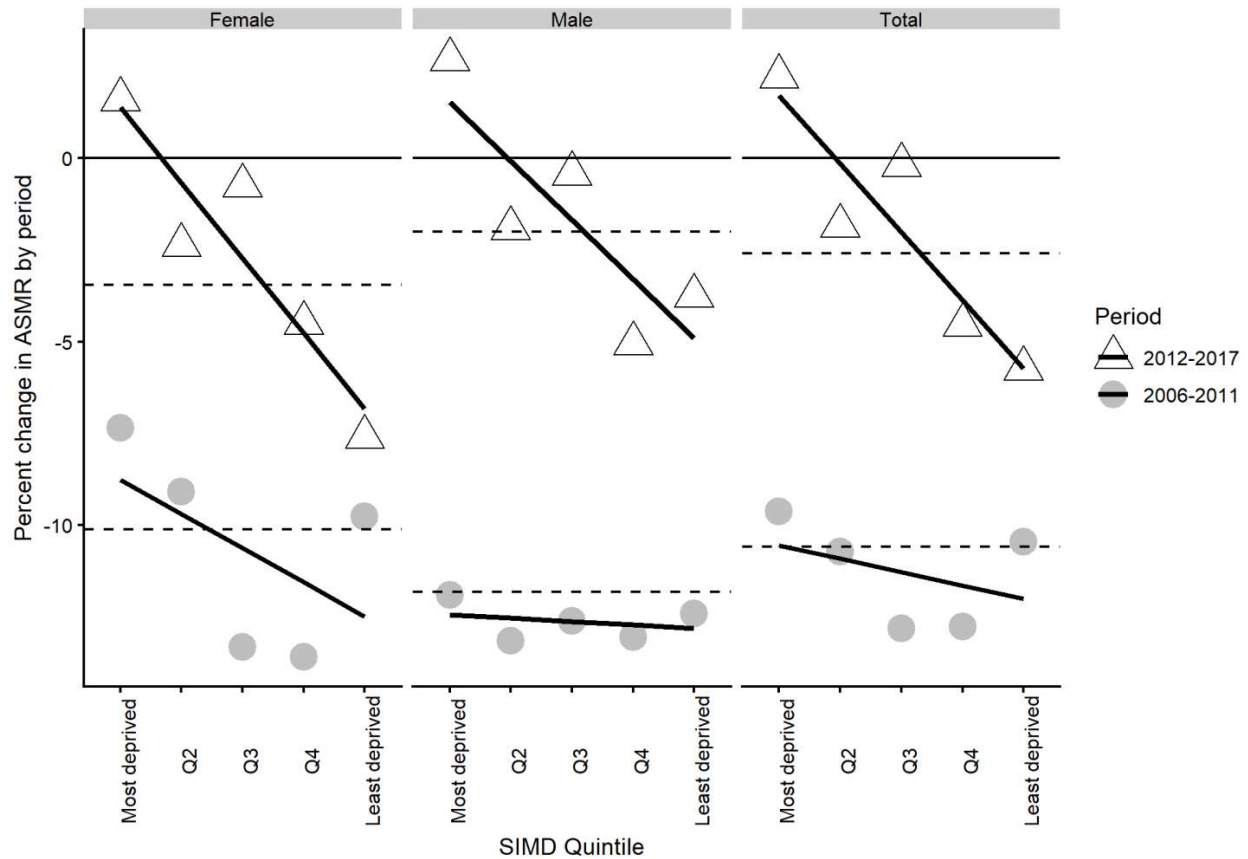

**Supplementary figure 1B:** Percentage change in ASMR (calculated by linear model of values across period) by period (2006-2010; 2012-2017) by gender and SIMD quintile. Horizontal dashed lines indicate average change in Scotland by period and gender, using fitted rather than observed values.
